# Supplementary material for: Robust and rapid pipeline for the development of mRNA vaccine for the fast-emerging SARS-CoV-2 variants
Source: Research Square preprint supplement (doi:10.21203/rs.3.rs-2074769/v1), 2022-10-17
Supplement: Supplementary file 1 [file 371ef83a324b15bacd305a7d.xlsx]

## Sheet: Sheet1
Supplementary Table S1: List of designed overlapping oligonucleotides for the assembly of spike of Omicron variant (B.1.1529) of SARS-CoV-2
Name	Detail	Type	Length	Tm°	Sequence (5' - 3')
ML381	SPIKE-MUTANT	Forward	28	64.5	CTAGCAGTGTTAAATCATTCAGCTACCT
ML382	SPIKE-MUTANT	Forward	97	89.4	﻿CTAGCAGTGTTAAATCATTCAGCTACCTGAGAGGGGCCCCTATAACTCTCTACGGCTAACCTGAATGGACTACGACATAGTCTAGTCCGCCAAGATG
ML383	SPIKE-MUTANT	Forward	113	94	﻿TTTCTGCTCACAACCAAACGCACTATGTTTGTTTTCCTCGTGCTGCTCCCTTTGGTAAGTTCTCAGTGTGTAAACCTGACAACACGAACCCAGTTGCCTCCAGCTTATACCAA
ML384	SPIKE-MUTANT	Forward	118	88.8	﻿CTCATTTACTCGCGGAGTATATTATCCCGATAAGGTCTTTAGAAGTAGCGTGTTGCACTCTACACAGGATCTGTTCTTGCCCTTCTTTAGTAACGTTACCTGGTTTCATGTGATAAGC
ML385	SPIKE-MUTANT	Forward	109	91.7	﻿GGAACAAATGGAACAAAAAGATTTGACAATCCAGTGCTTCCATTTAATGATGGGGTTTACTTTGCCAGTATCGAAAAGTCAAACATAATCCGGGGGTGGATCTTTGGAA
ML386	SPIKE-MUTANT	Forward	103	90.7	﻿CCACTTTGGACTCTAAGACACAGTCTCTCCTCATAGTAAACAACGCCACCAATGTTGTCATAAAAGTATGCGAATTTCAGTTTTGCAACGATCCCTTTCTCGA
ML387	SPIKE-MUTANT	Forward	101	88.7	﻿CCATAAGAATAATAAATCCTGGATGGAGTCTGAGTTCCGGGTTTATAGTAGTGCTAATAATTGCACTTTCGAATACGTGTCCCAACCATTCCTCATGGACC
ML388	SPIKE-MUTANT	Forward	105	88.1	﻿TTGAGGGCAAACAGGGGAATTTTAAAAACTTGCGCGAATTTGTCTTTAAGAATATCGACGGATACTTTAAGATCTATAGTAAACACACTCCTATCATCGTTCGGG
ML389	SPIKE-MUTANT	Forward	99	94.4	﻿AGCCCGAGGATCTTCCCCAAGGCTTTTCTGCTCTCGAACCCCTCGTAGACTTGCCAATTGGGATAAATATCACTCGCTTTCAAACTTTGCTTGCCCTCC
ML390	SPIKE-MUTANT	Forward	101	97.7	﻿ACAGGAGCTACCTGACACCCGGCGACTCTTCTTCTGGTTGGACCGCCGGCGCCGCTGCCTATTATGTTGGTTACCTTCAGCCACGAACATTCTTGCTCAAG
ML391	SPIKE-MUTANT	Forward	109	92.3	﻿TATAACGAGAATGGCACCATTACCGACGCCGTCGATTGTGCATTGGATCCCTTGTCTGAAACAAAATGTACCTTGAAGTCCTTTACCGTAGAGAAAGGCATATACCAGA
ML392	SPIKE-MUTANT	Forward	113	93.5	﻿CTTCCAACTTCCGAGTTCAGCCTACAGAATCCATCGTACGATTTCCCAACATCACAAACCTCTGCCCTTTCGACGAAGTATTTAATGCTACACGCTTCGCTTCAGTCTATGCC
ML393	SPIKE-MUTANT	Forward	112	94.2	﻿TGGAATAGGAAGCGCATATCAAATTGCGTGGCCGATTATTCAGTCCTCTATAATCTGGCACCCTTCTTCACTTTCAAGTGCTACGGCGTTTCCCCCACCAAACTCAATGATC
ML394	SPIKE-MUTANT	Forward	99	93.9	﻿TTTGCTTCACCAACGTCTATGCTGACAGTTTTGTCATACGAGGCGACGAAGTACGCCAGATTGCCCCCGGGCAGACAGGTAACATTGCTGATTATAATT
ML395	SPIKE-MUTANT	Forward	106	88.9	﻿ATAAACTCCCAGATGACTTTACTGGATGCGTCATAGCCTGGAATTCCAACAAGCTAGATTCCAAGGTTTCCGGGAATTATAATTACCTTTATCGACTGTTCAGAAA
ML396	SPIKE-MUTANT	Forward	105	91.8	﻿GAGTAACTTGAAACCATTTGAGAGAGACATATCCACCGAGATTTACCAGGCAGGCAACAAGCCTTGTAACGGCGTTGCCGGATTTAACTGCTATTTTCCTTTGAG
ML397	SPIKE-MUTANT	Forward	109	96.2	﻿ATCCTATTCCTTTAGACCAACATACGGGGTTGGCCACCAACCCTATCGAGTGGTTGTCCTCAGCTTTGAACTTTTGCACGCTCCCGCCACAGTCTGCGGACCAAAAAAG
ML398	SPIKE-MUTANT	Forward	100	90	﻿AGTACAAATCTTGTCAAGAATAAGTGCGTAAATTTCAATTTCAATGGCCTTAAGGGAACAGGCGTGCTGACTGAGTCAAACAAGAAGTTCCTGCCATTTC
ML399	SPIKE-MUTANT	Forward	107	95.4	﻿AGCAGTTTGGGCGGGATATAGCAGACACAACTGACGCTGTACGCGATCCTCAGACTTTGGAGATCTTGGACATCACTCCCTGTTCTTTCGGAGGGGTATCTGTCATC
ML400	SPIKE-MUTANT	Forward	103	96.2	﻿ACCCCCGGAACTAATACATCAAATCAGGTCGCTGTGTTGTACCAAGGTGTCAACTGCACAGAAGTCCCCGTTGCTATACACGCAGACCAGCTCACCCCCACAT
ML401	SPIKE-MUTANT	Forward	100	94.2	﻿GGCGGGTGTACTCAACTGGCTCAAACGTATTCCAGACCAGAGCTGGGTGCTTGATCGGTGCTGAATACGTGAACAATAGCTATGAATGCGATATTCCCAT
ML402	SPIKE-MUTANT	Forward	116	96.8	﻿CGGTGCCGGGATCTGCGCTAGCTATCAGACACAGACCAAGTCCCACAGTGGAGCAGGATCTGTAGCATCCCAGTCTATTATTGCCTACACTATGTCATTGGGCGCCGAGAATAGCG
ML403	SPIKE-MUTANT	Forward	117	88.2	﻿TCGCATATTCAAATAATTCTATTGCAATACCCACCAACTTCACAATCTCCGTAACTACAGAAATACTTCCAGTTTCCATGACAAAGACATCAGTGGATTGTACAATGTATATATGCG
ML404	SPIKE-MUTANT	Forward	113	94.4	﻿GAGATTCCACAGAATGTTCAAATTTGCTCTTGCAGTACGGCTCCTTCTGCACCCAGCTCAAGAGGGCACTTACAGGTATTGCTGTCGAACAGGACAAGAACACACAAGAAGTC
ML405	SPIKE-MUTANT	Forward	111	90	﻿TTCGCCCAAGTCAAACAGATATACAAAACTCCTCCCATAAAGTACTTTGGCGGCTTCAACTTTAGTCAGATCCTCCCAGACCCTTCAAAACCATCTAAACGATCATTTATT
ML406	SPIKE-MUTANT	Forward	119	96.4	﻿GAAGATCTGCTGTTCAACAAGGTCACTCTTGCCGATGCTGGATTCATTAAGCAATACGGTGACTGCCTTGGTGATATTGCTGCCCGAGATCTGATCTGTGCCCAGAAATTCAAGGGGCT
ML407	SPIKE-MUTANT	Forward	103	99	﻿CACTGTACTCCCTCCACTGCTCACAGACGAAATGATTGCACAGTACACAAGTGCCCTGTTGGCAGGCACAATCACTAGCGGCTGGACCTTTGGCGCAGGTGCA
ML408	SPIKE-MUTANT	Forward	110	91.2	﻿GCACTCCAAATACCTTTTGCCATGCAGATGGCCTATCGGTTTAATGGGATAGGCGTGACTCAAAATGTCCTCTACGAAAACCAAAAGTTGATAGCTAACCAATTCAATTC
ML409	SPIKE-MUTANT	Forward	101	92.4	﻿AGCAATCGGGAAGATACAGGATTCACTGTCTAGTACTGCTAGTGCCCTTGGTAAGCTGCAGGACGTTGTCAACCACAATGCTCAAGCTCTGAATACATTGG
ML410	SPIKE-MUTANT	Forward	111	91.4	﻿TTAAGCAGCTCTCTAGTAAGTTTGGGGCCATCTCTTCAGTACTTAATGATATTTTCAGCCGATTGGACCCACCTGAAGCTGAAGTACAGATCGACAGGCTGATAACAGGCC
ML411	SPIKE-MUTANT	Forward	108	98.8	﻿GGCTCCAATCCCTCCAAACATACGTGACACAACAACTCATACGCGCAGCCGAAATCCGAGCCAGCGCTAACCTGGCAGCTACCAAGATGTCAGAATGCGTTCTGGGCC
ML412	SPIKE-MUTANT	Forward	108	95	﻿AGAGTAAACGCGTAGATTTCTGCGGGAAAGGGTACCACCTGATGTCCTTTCCACAATCTGCACCTCACGGGGTCGTCTTTTTGCATGTAACATACGTACCCGCACAAG
ML413	SPIKE-MUTANT	Forward	105	92.6	﻿AGAAGAATTTTACTACCGCTCCTGCCATCTGTCATGACGGGAAAGCTCATTTTCCTCGCGAAGGTGTGTTTGTATCTAATGGTACACATTGGTTTGTCACACAGC
ML414	SPIKE-MUTANT	Forward	111	90.8	﻿GGAATTTCTATGAACCCCAGATCATTACAACTGACAACACTTTTGTTTCCGGGAATTGTGACGTGGTCATAGGAATCGTAAATAACACTGTATATGATCCCCTCCAACCAG
ML415	SPIKE-MUTANT	Forward	96	89.4	﻿AGCTGGACTCTTTTAAAGAAGAACTGGATAAATATTTCAAGAACCACACAAGTCCCGACGTGGACCTTGGGGACATAAGTGGTATTAACGCATCTG
ML416	SPIKE-MUTANT	Forward	108	90.8	﻿TGGTTAACATTCAAAAGGAAATCGACAGACTCAACGAGGTGGCCAAAAACCTGAACGAAAGCTTGATAGATCTCCAGGAGTTGGGCAAGTATGAACAGTACATTAAAT
ML417	SPIKE-MUTANT	Forward	98	94.9	﻿GGCCATGGTACATATGGCTTGGCTTTATCGCTGGCCTTATCGCCATCGTAATGGTTACAATCATGCTGTGCTGCATGACCTCCTGCTGTTCTTGTTTG
ML418	SPIKE-MUTANT	Forward	76	88.4	﻿AAAGGGTGTTGTTCTTGTGGTAGTTGTTGCAAGTTTGACGAAGATGATTCCGAACCTGTTCTTAAGGGGGTAAAGC
ML419	SPIKE-MUTANT	Forward	89	91.5	﻿TTCACTATACATGATAACCGCGGGTCAAAAACCGCGTGGACGTGGTTAACATCCCTGCTGGGAGGATCAGCCGTAATTATTATAATTGG
ML420	SPIKE-MUTANT	Reverse	61	88.4	﻿CCAAGCCAATTATAATAATTACGGCTGATCCTCCCAGCAGGGATGTTAACCACGTCCACGC
ML421	SPIKE-MUTANT	Reverse	33	80.1	﻿TTACGGCTGATCCTCCCAGCAGGGATGTTAACC
ML422	SPIKE-MUTANT	Reverse	84	89.5	﻿GGTTTTTGACCCGCGGTTATCATGTATAGTGAAGCTTTACCCCCTTAAGAACAGGTTCGGAATCATCTTCGTCAAACTTGCAAC
ML423	SPIKE-MUTANT	Reverse	93	93	﻿AACTACCACAAGAACAACACCCTTTCAAACAAGAACAGCAGGAGGTCATGCAGCACAGCATGATTGTAACCATTACGATGGCGATAAGGCCAG
ML424	SPIKE-MUTANT	Reverse	87	89.3	﻿CGATAAAGCCAAGCCATATGTACCATGGCCATTTAATGTACTGTTCATACTTGCCCAACTCCTGGAGATCTATCAAGCTTTCGTTCA
ML425	SPIKE-MUTANT	Reverse	95	93.6	﻿GGTTTTTGGCCACCTCGTTGAGTCTGTCGATTTCCTTTTGAATGTTAACCACAGATGCGTTAATACCACTTATGTCCCCAAGGTCCACGTCGGGA
ML426	SPIKE-MUTANT	Reverse	86	84.3	﻿CTTGTGTGGTTCTTGAAATATTTATCCAGTTCTTCTTTAAAAGAGTCCAGCTCTGGTTGGAGGGGATCATATACAGTGTTATTTAC
ML427	SPIKE-MUTANT	Reverse	100	92.1	﻿GATTCCTATGACCACGTCACAATTCCCGGAAACAAAAGTGTTGTCAGTTGTAATGATCTGGGGTTCATAGAAATTCCGCTGTGTGACAAACCAATGTGTA
ML428	SPIKE-MUTANT	Reverse	106	92.2	﻿CCATTAGATACAAACACACCTTCGCGAGGAAAATGAGCTTTCCCGTCATGACAGATGGCAGGAGCGGTAGTAAAATTCTTCTCTTGTGCGGGTACGTATGTTACAT
ML429	SPIKE-MUTANT	Reverse	106	96.1	﻿GCAAAAAGACGACCCCGTGAGGTGCAGATTGTGGAAAGGACATCAGGTGGTACCCTTTCCCGCAGAAATCTACGCGTTTACTCTGGCCCAGAACGCATTCTGACAT
ML430	SPIKE-MUTANT	Reverse	105	98.2	﻿CTTGGTAGCTGCCAGGTTAGCGCTGGCTCGGATTTCGGCTGCGCGTATGAGTTGTTGTGTCACGTATGTTTGGAGGGATTGGAGCCGGCCTGTTATCAGCCTGTC
ML431	SPIKE-MUTANT	Reverse	79	87	﻿GATCTGTACTTCAGCTTCAGGTGGGTCCAATCGGCTGAAAATATCATTAAGTACTGAAGAGATGGCCCCAAACTTACTA
ML432	SPIKE-MUTANT	Reverse	76	90.4	﻿GAGAGCTGCTTAACCAATGTATTCAGAGCTTGAGCATTGTGGTTGACAACGTCCTGCAGCTTACCAAGGGCACTAG
ML433	SPIKE-MUTANT	Reverse	117	89.7	﻿CAGTACTAGACAGTGAATCCTGTATCTTCCCGATTGCTGAATTGAATTGGTTAGCTATCAACTTTTGGTTTTCGTAGAGGACATTTTGAGTCACGCCTATCCCATTAAACCGATAGG
ML434	SPIKE-MUTANT	Reverse	96	98.4	﻿CCATCTGCATGGCAAAAGGTATTTGGAGTGCTGCACCTGCGCCAAAGGTCCAGCCGCTAGTGATTGTGCCTGCCAACAGGGCACTTGTGTACTGTG
ML435	SPIKE-MUTANT	Reverse	106	96.3	﻿CAATCATTTCGTCTGTGAGCAGTGGAGGGAGTACAGTGAGCCCCTTGAATTTCTGGGCACAGATCAGATCTCGGGCAGCAATATCACCAAGGCAGTCACCGTATTG
ML436	SPIKE-MUTANT	Reverse	109	90.9	﻿CTTAATGAATCCAGCATCGGCAAGAGTGACCTTGTTGAACAGCAGATCTTCAATAAATGATCGTTTAGATGGTTTTGAAGGGTCTGGGAGGATCTGACTAAAGTTGAAG
ML437	SPIKE-MUTANT	Reverse	99	89.9	﻿CCGCCAAAGTACTTTATGGGAGGAGTTTTGTATATCTGTTTGACTTGGGCGAAGACTTCTTGTGTGTTCTTGTCCTGTTCGACAGCAATACCTGTAAGT
ML438	SPIKE-MUTANT	Reverse	91	92.3	﻿GCCCTCTTGAGCTGGGTGCAGAAGGAGCCGTACTGCAAGAGCAAATTTGAACATTCTGTGGAATCTCCGCATATATACATTGTACAATCCA
ML439	SPIKE-MUTANT	Reverse	116	91.3	﻿CTGATGTCTTTGTCATGGAAACTGGAAGTATTTCTGTAGTTACGGAGATTGTGAAGTTGGTGGGTATTGCAATAGAATTATTTGAATATGCGACGCTATTCTCGGCGCCCAATGAC
ML440	SPIKE-MUTANT	Reverse	56	83.3	﻿ATAGTGTAGGCAATAATAGACTGGGATGCTACAGATCCTGCTCCACTGTGGGACTT
ML441	SPIKE-MUTANT	Reverse	105	96.2	﻿GGTCTGTGTCTGATAGCTAGCGCAGATCCCGGCACCGATGGGAATATCGCATTCATAGCTATTGTTCACGTATTCAGCACCGATCAAGCACCCAGCTCTGGTCTG
ML442	SPIKE-MUTANT	Reverse	93	96.5	﻿GAATACGTTTGAGCCAGTTGAGTACACCCGCCATGTGGGGGTGAGCTGGTCTGCGTGTATAGCAACGGGGACTTCTGTGCAGTTGACACCTTG
ML443	SPIKE-MUTANT	Reverse	105	93.6	﻿GTACAACACAGCGACCTGATTTGATGTATTAGTTCCGGGGGTGATGACAGATACCCCTCCGAAAGAACAGGGAGTGATGTCCAAGATCTCCAAAGTCTGAGG
ML444	SPIKE-MUTANT	Reverse	120	95	﻿ATCGCGTACAGCGTCAGTTGTGTCTGCTATATCCCGCCCAAACTGCTGAAATGGCAGGAACTTCTTGTTTGACTCAGTCAGCACGCCTGTTCCCTTAAGGCCATTGAAATTGAAATTTAC
ML445	SPIKE-MUTANT	Reverse	111	96.1	﻿GCACTTATTCTTGACAAGATTTGTACTCTTTTTTGGTCCGCAGACTGTGGCGGGAGCGTGCAAAAGTTCAAAGCTGAGGACAACCACTCGATAGGGTTGGTGGCCAACCCC
ML446	SPIKE-MUTANT	Reverse	95	90.7	﻿GTATGTTGGTCTAAAGGAATAGGATCTCAAAGGAAAATAGCAGTTAAATCCGGCAACGCCGTTACAAGGCTTGTTGCCTGCCTGGTAAATCTCGG
ML447	SPIKE-MUTANT	Reverse	103	87.5	﻿TGGATATGTCTCTCTCAAATGGTTTCAAGTTACTCTTTCTGAACAGTCGATAAAGGTAATTATAATTCCCGGAAACCTTGGAATCTAGCTTGTTGGAATTCCA
ML448	SPIKE-MUTANT	Reverse	96	92.6	﻿GGCTATGACGCATCCAGTAAAGTCATCTGGGAGTTTATAATTATAATCAGCAATGTTACCTGTCTGCCCGGGGGCAATCTGGCGTACTTCGTCGCC
ML449	SPIKE-MUTANT	Reverse	111	93.5	﻿TCGTATGACAAAACTGTCAGCATAGACGTTGGTGAAGCAAAGATCATTGAGTTTGGTGGGGGAAACGCCGTAGCACTTGAAAGTGAAGAAGGGTGCCAGATTATAGAGGAC
ML450	SPIKE-MUTANT	Reverse	103	93.1	﻿TGAATAATCGGCCACGCAATTTGATATGCGCTTCCTATTCCAGGCATAGACTGAAGCGAAGCGTGTAGCATTAAATACTTCGTCGAAAGGGCAGAGGTTTGTG
ML451	SPIKE-MUTANT	Reverse	104	89.5	﻿ATGTTGGGAAATCGTACGATGGATTCTGTAGGCTGAACTCGGAAGTTGGAAGTCTGGTATATGCCTTTCTCTACGGTAAAGGACTTCAAGGTACATTTTGTTTC
ML452	SPIKE-MUTANT	Reverse	117	97.9	﻿AGACAAGGGATCCAATGCACAATCGACGGCGTCGGTAATGGTGCCATTCTCGTTATACTTGAGCAAGAATGTTCGTGGCTGAAGGTAACCAACATAATAGGCAGCGGCGCCGGCGGT
ML453	SPIKE-MUTANT	Reverse	110	95.5	﻿CCAACCAGAAGAAGAGTCGCCGGGTGTCAGGTAGCTCCTGTGGAGGGCAAGCAAAGTTTGAAAGCGAGTGATATTTATCCCAATTGGCAAGTCTACGAGGGGTTCGAGAG
ML454	SPIKE-MUTANT	Reverse	93	88	﻿CAGAAAAGCCTTGGGGAAGATCCTCGGGCTCCCGAACGATGATAGGAGTGTGTTTACTATAGATCTTAAAGTATCCGTCGATATTCTTAAAGA
ML455	SPIKE-MUTANT	Reverse	105	90.9	﻿CAAATTCGCGCAAGTTTTTAAAATTCCCCTGTTTGCCCTCAAGGTCCATGAGGAATGGTTGGGACACGTATTCGAAAGTGCAATTATTAGCACTACTATAAACCC
ML456	SPIKE-MUTANT	Reverse	111	90	﻿GGAACTCAGACTCCATCCAGGATTTATTATTCTTATGGTCGAGAAAGGGATCGTTGCAAAACTGAAATTCGCATACTTTTATGACAACATTGGTGGCGTTGTTTACTATGA
ML457	SPIKE-MUTANT	Reverse	112	92	﻿GGAGAGACTGTGTCTTAGAGTCCAAAGTGGTTCCAAAGATCCACCCCCGGATTATGTTTGACTTTTCGATACTGGCAAAGTAAACCCCATCATTAAATGGAAGCACTGGATT
ML458	SPIKE-MUTANT	Reverse	110	89.4	﻿GTCAAATCTTTTTGTTCCATTTGTTCCGCTTATCACATGAAACCAGGTAACGTTACTAAAGAAGGGCAAGAACAGATCCTGTGTAGAGTGCAACACGCTACTTCTAAAGA
ML459	SPIKE-MUTANT	Reverse	81	88	﻿CCTTATCGGGATAATATACTCCGCGAGTAAATGAGTTGGTATAAGCTGGAGGCAACTGGGTTCGTGTTGTCAGGTTTACAC
ML460	SPIKE-MUTANT	Reverse	102	92	﻿ACTGAGAACTTACCAAAGGGAGCAGCACGAGGAAAACAAACATAGTGCGTTTGGTTGTGAGCAGAAACATCTTGGCGGACTAGACTATGTCGTAGTCCATTC
ML461	SPIKE-MUTANT	Reverse	66	84.1	﻿AGGTTAGCCGTAGAGAGTTATAGGGGCCCCTCTCAGGTAGCTGAATGATTTAACACTGCTAGCTAG
ML506	SPIKE-MUTANT	Forward	49	85.5	﻿ACGACATAGTCTAGTCCGCCAAGATGTTTCTGCTCACAACCAAACGCAC
ML507	SPIKE-MUTANT	Forward	47	78	﻿GTTGCCTCCAGCTTATACCAACTCATTTACTCGCGGAGTATATTATC
ML508	SPIKE-MUTANT	Forward	49	80.8	﻿GTTACCTGGTTTCATGTGATAAGCGGAACAAATGGAACAAAAAGATTTG
ML509	SPIKE-MUTANT	Forward	56	86.5	﻿CATAATCCGGGGGTGGATCTTTGGAACCACTTTGGACTCTAAGACACAGTCTCTCC
ML510	SPIKE-MUTANT	Forward	46	79.5	﻿GTTTTGCAACGATCCCTTTCTCGACCATAAGAATAATAAATCCTGG
ML511	SPIKE-MUTANT	Forward	49	88.8	﻿CGTGTCCCAACCATTCCTCATGGACCTTGAGGGCAAACAGGGGAATTTT
ML512	SPIKE-MUTANT	Forward	55	89.4	﻿AAACACACTCCTATCATCGTTCGGGAGCCCGAGGATCTTCCCCAAGGCTTTTCTG
ML513	SPIKE-MUTANT	Forward	45	87	﻿CTTTCAAACTTTGCTTGCCCTCCACAGGAGCTACCTGACACCCGG
ML514	SPIKE-MUTANT	Forward	49	84.9	﻿CAGCCACGAACATTCTTGCTCAAGTATAACGAGAATGGCACCATTACCG
ML515	SPIKE-MUTANT	Forward	46	82.3	﻿CCGTAGAGAAAGGCATATACCAGACTTCCAACTTCCGAGTTCAGCC
ML516	SPIKE-MUTANT	Forward	49	85.1	﻿CACGCTTCGCTTCAGTCTATGCCTGGAATAGGAAGCGCATATCAAATTG
ML517	SPIKE-MUTANT	Forward	49	86.2	﻿TTCCCCCACCAAACTCAATGATCTTTGCTTCACCAACGTCTATGCTGAC
ML518	SPIKE-MUTANT	Forward	48	73.6	﻿GACAGGTAACATTGCTGATTATAATTATAAACTCCCAGATGACTTTAC
ML519	SPIKE-MUTANT	Forward	54	77.6	﻿AATTACCTTTATCGACTGTTCAGAAAGAGTAACTTGAAACCATTTGAGAGAGAC
ML520	SPIKE-MUTANT	Forward	50	75.1	﻿GATTTAACTGCTATTTTCCTTTGAGATCCTATTCCTTTAGACCAACATAC
ML521	SPIKE-MUTANT	Forward	48	79.7	﻿CACAGTCTGCGGACCAAAAAAGAGTACAAATCTTGTCAAGAATAAGTG
ML522	SPIKE-MUTANT	Forward	49	85.8	﻿TCAAACAAGAAGTTCCTGCCATTTCAGCAGTTTGGGCGGGATATAGCAG
ML523	SPIKE-MUTANT	Forward	51	84	﻿GTTCTTTCGGAGGGGTATCTGTCATCACCCCCGGAACTAATACATCAAATC
ML524	SPIKE-MUTANT	Forward	51	93	﻿CACGCAGACCAGCTCACCCCCACATGGCGGGTGTACTCAACTGGCTCAAAC
ML525	SPIKE-MUTANT	Forward	53	87.3	﻿CAATAGCTATGAATGCGATATTCCCATCGGTGCCGGGATCTGCGCTAGCTATC
ML526	SPIKE-MUTANT	Forward	48	83.7	﻿GTCATTGGGCGCCGAGAATAGCGTCGCATATTCAAATAATTCTATTGC
ML527	SPIKE-MUTANT	Forward	49	78.6	﻿GGATTGTACAATGTATATATGCGGAGATTCCACAGAATGTTCAAATTTG
ML528	SPIKE-MUTANT	Forward	52	83.1	﻿CGAACAGGACAAGAACACACAAGAAGTCTTCGCCCAAGTCAAACAGATATAC
ML529	SPIKE-MUTANT	Forward	48	79.2	﻿CAAAACCATCTAAACGATCATTTATTGAAGATCTGCTGTTCAACAAGG
ML530	SPIKE-MUTANT	Forward	51	88.2	﻿GATCTGTGCCCAGAAATTCAAGGGGCTCACTGTACTCCCTCCACTGCTCAC
ML531	SPIKE-MUTANT	Forward	51	92	﻿GGCTGGACCTTTGGCGCAGGTGCAGCACTCCAAATACCTTTTGCCATGCAG
ML532	SPIKE-MUTANT	Forward	50	81	﻿GTTGATAGCTAACCAATTCAATTCAGCAATCGGGAAGATACAGGATTCAC
ML533	SPIKE-MUTANT	Forward	50	78.7	﻿CAATGCTCAAGCTCTGAATACATTGGTTAAGCAGCTCTCTAGTAAGTTTG
ML534	SPIKE-MUTANT	Forward	49	88.9	﻿CAGATCGACAGGCTGATAACAGGCCGGCTCCAATCCCTCCAAACATACG
ML535	SPIKE-MUTANT	Forward	49	85.7	﻿CAAGATGTCAGAATGCGTTCTGGGCCAGAGTAAACGCGTAGATTTCTGC
ML536	SPIKE-MUTANT	Forward	51	83	﻿CATGTAACATACGTACCCGCACAAGAGAAGAATTTTACTACCGCTCCTGCC
ML537	SPIKE-MUTANT	Forward	48	83.9	﻿GGTACACATTGGTTTGTCACACAGCGGAATTTCTATGAACCCCAGATC
ML538	SPIKE-MUTANT	Forward	50	80.5	﻿CACTGTATATGATCCCCTCCAACCAGAGCTGGACTCTTTTAAAGAAGAAC
ML539	SPIKE-MUTANT	Forward	48	77.4	﻿GACATAAGTGGTATTAACGCATCTGTGGTTAACATTCAAAAGGAAATC
ML540	SPIKE-MUTANT	Forward	49	82.9	﻿GGGCAAGTATGAACAGTACATTAAATGGCCATGGTACATATGGCTTGGC
ML541	SPIKE-MUTANT	Forward	48	83.4	﻿CATGACCTCCTGCTGTTCTTGTTTGAAAGGGTGTTGTTCTTGTGGTAG
ML542	SPIKE-MUTANT	Forward	53	84.4	﻿CCGAACCTGTTCTTAAGGGGGTAAAGCTTCACTATACATGATAACCGCGGGTC
ML543	SPIKE-MUTANT	Reverse	48	89.8	﻿CAGGGATGTTAACCACGTCCACGCGGTTTTTGACCCGCGGTTATCATG
ML544	SPIKE-MUTANT	Reverse	48	82.1	﻿GAATCATCTTCGTCAAACTTGCAACAACTACCACAAGAACAACACCCT
ML545	SPIKE-MUTANT	Reverse	47	84.4	﻿CCATTACGATGGCGATAAGGCCAGCGATAAAGCCAAGCCATATGTAC
ML546	SPIKE-MUTANT	Reverse	46	83.8	﻿GGAGATCTATCAAGCTTTCGTTCAGGTTTTTGGCCACCTCGTTGAG
ML547	SPIKE-MUTANT	Reverse	50	84.8	﻿ATGTCCCCAAGGTCCACGTCGGGACTTGTGTGGTTCTTGAAATATTTATC
ML548	SPIKE-MUTANT	Reverse	46	77.9	﻿AGGGGATCATATACAGTGTTATTTACGATTCCTATGACCACGTCAC
ML549	SPIKE-MUTANT	Reverse	51	86	﻿CCGCTGTGTGACAAACCAATGTGTACCATTAGATACAAACACACCTTCGCG
ML550	SPIKE-MUTANT	Reverse	48	86.5	﻿CTCTTGTGCGGGTACGTATGTTACATGCAAAAAGACGACCCCGTGAGG
ML551	SPIKE-MUTANT	Reverse	47	89	﻿CTGGCCCAGAACGCATTCTGACATCTTGGTAGCTGCCAGGTTAGCGC
ML552	SPIKE-MUTANT	Reverse	44	85.2	﻿CCGGCCTGTTATCAGCCTGTCGATCTGTACTTCAGCTTCAGGTG
ML553	SPIKE-MUTANT	Reverse	45	78.5	﻿GAGATGGCCCCAAACTTACTAGAGAGCTGCTTAACCAATGTATTC
ML554	SPIKE-MUTANT	Reverse	46	82	﻿CCTGCAGCTTACCAAGGGCACTAGCAGTACTAGACAGTGAATCCTG
ML555	SPIKE-MUTANT	Reverse	52	86.7	﻿CACGCCTATCCCATTAAACCGATAGGCCATCTGCATGGCAAAAGGTATTTGG
ML556	SPIKE-MUTANT	Reverse	46	86.1	﻿CCAACAGGGCACTTGTGTACTGTGCAATCATTTCGTCTGTGAGCAG
ML557	SPIKE-MUTANT	Reverse	49	86	﻿TATCACCAAGGCAGTCACCGTATTGCTTAATGAATCCAGCATCGGCAAG
ML558	SPIKE-MUTANT	Reverse	49	82.9	﻿GGGAGGATCTGACTAAAGTTGAAGCCGCCAAAGTACTTTATGGGAGGAG
ML559	SPIKE-MUTANT	Reverse	47	87	﻿CCTGTTCGACAGCAATACCTGTAAGTGCCCTCTTGAGCTGGGTGCAG
ML560	SPIKE-MUTANT	Reverse	49	80.1	﻿CGCATATATACATTGTACAATCCACTGATGTCTTTGTCATGGAAACTGG
ML561	SPIKE-MUTANT	Reverse	46	81.8	﻿GACGCTATTCTCGGCGCCCAATGACATAGTGTAGGCAATAATAGAC
ML562	SPIKE-MUTANT	Reverse	47	86	﻿CAGATCCTGCTCCACTGTGGGACTTGGTCTGTGTCTGATAGCTAGCG
ML563	SPIKE-MUTANT	Reverse	48	85.1	﻿GATCAAGCACCCAGCTCTGGTCTGGAATACGTTTGAGCCAGTTGAGTA
ML564	SPIKE-MUTANT	Reverse	47	84.9	﻿GACTTCTGTGCAGTTGACACCTTGGTACAACACAGCGACCTGATTTG
ML565	SPIKE-MUTANT	Reverse	49	87.4	﻿CCAAGATCTCCAAAGTCTGAGGATCGCGTACAGCGTCAGTTGTGTCTGC
ML566	SPIKE-MUTANT	Reverse	50	78.7	﻿GGCCATTGAAATTGAAATTTACGCACTTATTCTTGACAAGATTTGTACTC
ML567	SPIKE-MUTANT	Reverse	45	83.5	﻿CGATAGGGTTGGTGGCCAACCCCGTATGTTGGTCTAAAGGAATAG
ML568	SPIKE-MUTANT	Reverse	48	84.3	﻿CTTGTTGCCTGCCTGGTAAATCTCGGTGGATATGTCTCTCTCAAATGG
ML569	SPIKE-MUTANT	Reverse	48	82.1	﻿GGAATCTAGCTTGTTGGAATTCCAGGCTATGACGCATCCAGTAAAGTC
ML570	SPIKE-MUTANT	Reverse	49	86.2	﻿GGCAATCTGGCGTACTTCGTCGCCTCGTATGACAAAACTGTCAGCATAG
ML571	SPIKE-MUTANT	Reverse	50	84.1	﻿GAAGAAGGGTGCCAGATTATAGAGGACTGAATAATCGGCCACGCAATTTG
ML572	SPIKE-MUTANT	Reverse	48	87.1	﻿CTTCGTCGAAAGGGCAGAGGTTTGTGATGTTGGGAAATCGTACGATGG
ML573	SPIKE-MUTANT	Reverse	47	81.4	﻿GACTTCAAGGTACATTTTGTTTCAGACAAGGGATCCAATGCACAATC
ML574	SPIKE-MUTANT	Reverse	51	94.6	﻿CATAATAGGCAGCGGCGCCGGCGGTCCAACCAGAAGAAGAGTCGCCGGGTG
ML575	SPIKE-MUTANT	Reverse	47	86.6	﻿GCAAGTCTACGAGGGGTTCGAGAGCAGAAAAGCCTTGGGGAAGATCC
ML576	SPIKE-MUTANT	Reverse	55	78.1	﻿CTTAAAGTATCCGTCGATATTCTTAAAGACAAATTCGCGCAAGTTTTTAAAATTC
ML577	SPIKE-MUTANT	Reverse	47	78.6	﻿CAATTATTAGCACTACTATAAACCCGGAACTCAGACTCCATCCAGGA
ML578	SPIKE-MUTANT	Reverse	54	82.6	﻿CAACATTGGTGGCGTTGTTTACTATGAGGAGAGACTGTGTCTTAGAGTCCAAAG
ML579	SPIKE-MUTANT	Reverse	52	81.9	﻿CATCATTAAATGGAAGCACTGGATTGTCAAATCTTTTTGTTCCATTTGTTCC
ML580	SPIKE-MUTANT	Reverse	50	81	﻿GAGTGCAACACGCTACTTCTAAAGACCTTATCGGGATAATATACTCCGCG
ML581	SPIKE-MUTANT	Reverse	48	83.9	﻿GGGTTCGTGTTGTCAGGTTTACACACTGAGAACTTACCAAAGGGAGCA
ML582	SPIKE-MUTANT	Reverse	48	74.8	﻿GACTAGACTATGTCGTAGTCCATTCAGGTTAGCCGTAGAGAGTTATAG
