# Supplementary material for: Robust and rapid pipeline for the development of mRNA vaccine for the fast-emerging SARS-CoV-2 variants
Source: Research Square preprint supplement (doi:10.21203/rs.3.rs-2074769/v1), 2022-10-17
Supplement: Supplementary file 2 [file 5eeef7ddbf24cde9146ca00e.xlsx]

## Sheet: Sheet1
Supplementary Table 2: List of primers used for the sequencing of assembled gene of spike in plasmid pVEE-101c.1.
Name	Detail	Sequence (5' - 3')
ML125	sequencing primer	CAAGGTATGAAACCGTAGGAAC
ML126	sequencing primer	CTCGGGGTGTATTACCATAAG
ML127	sequencing primer	ATGCTACACGCTTCGCTTC
ML128	sequencing primer	AGTTCCTGCCATTTCAGC
ML129	sequencing primer	CCCACCAACTTCACAATCTC
ML130	sequencing primer	GGCGTGACTCAAAATGTCC
ML131	sequencing primer	TTGGTTTGTCACACAGCGG
ML228	sequencing primer	TATCGAGTGGTTGTCCTGAGC
ML230	sequencing primer	﻿GTTTGAGCCAGTTGAGTAC
ML232	sequencing primer	CTAAAGTTGAAGCCGCCA
RP15	sequencing primer	AGTTCTATGTAAGCAGCTTGC
ML047	sequencing primer	﻿CCAGCAGGGATGTTAACCACGTCCACGC
