# Supplementary material for: Robust and rapid pipeline for the development of mRNA vaccine for the fast-emerging SARS-CoV-2 variants
Source: Research Square preprint supplement (doi:10.21203/rs.3.rs-2074769/v1), 2022-10-17
Supplement: Supplementary file 3 [file aa0893793c6339095d6d4dae.docx]

**Supplementary Table 1:** List of designed overlapping oligonucleotides for the assembly of spike of Omicron variant (B.1.1529) of SARS-CoV-2.

**Supplementary Table 2:** List of primers used for the sequencing of assembled gene of spike in plasmid pVEE-101c.1.

**Supplementary Figure 1**: **Original Ethidium bromide-stained agarose gel image of Figure 5b**.

Lane 1 of Figure 5b showing the 1kb plus DNA ladder is taken from lane 8, lane 2 of Figure 5b showing the B1 sub-fragment amplification at 70°C is taken from lane 14, and lane 3 of Figure 5b showing the B2 sub-fragment amplification at 70°C has been taken from lane 6. Other lanes represent additional optimization conditions.

**Supplementary Figure 2: Original Ethidium bromide-stained agarose gel image of Figure 5c**.

**(a)** Original Ethidium bromide-stained agarose gel image for Figure 5c; Lane 1 of Figure 5c representing the 1kb plus DNA ladder is taken from lane 8, lane 2 of Figure 5c showing the C1 sub-fragment amplification at 70°C is taken from lane 6, and lane 3 of Figure 5c showing the C2 sub-fragment amplification at 70°C has been taken from lane 10. Other lanes in Supplementary Figure 2 (a) depict further optimization conditions.

**(b)** Original Ethidium bromide-stained agarose gel image for Figure 5c; Lane 4 of Figure 5c showing the C3 sub-fragment amplification at 70°C is taken from lane 6, and lane 5 of Figure 5c showing the C4 sub-fragment amplification at 70°C has been taken from lane 14. Other lanes depict other optimization conditions.

**Supplementary Figure 3: Original Ethidium bromide-stained agarose gel image for Figure 5d**.

Lane 1 of Figure 5d displaying the 1kb plus DNA ladder has been taken from lane 1, lane 2 of Figure 5d showing the C1+C2 assembled sub-fragment amplification at 70°C has been taken from lane 4, and lane 3 of Figure 5d showing the C3+C4 assembled sub-fragment amplification at 70°C has been taken from lane 5. Other lanes depict additional optimization conditions.

**Supplementary Figure 4:** **Original Ethidium bromide-stained agarose gel image for Figure 5e.**

Lane 1 of Figure 5e showing the D1 sub-fragment amplification at 70°C is taken from lane 6, lane 2 of Figure 5e showing the D2 sub-fragment amplification at 70°C has been taken from lane 18, and lane 3 of Figure 5e depicting the 1kb plus DNA ladder is taken from lane 8. The rest of the lanes represent other optimization conditions.

**Supplementary Figure 5: Original Ethidium bromide-stained agarose gel image of Figure 5f**.

**(a)** Original Ethidium bromide-stained agarose gel image for Figure 5f; Lane 1 of Figure 5f representing the 1kb plus DNA ladder is taken from lane 1, lane 2 of Figure 5f showing the amplified Fragment A has been taken from lane 2, lane 3 of Figure 5f showing the amplified Fragment B has been taken from lane 3, and lane 5 of Figure 5f showing the amplified Fragment D has been taken from lane 6.

**(b)** Original Ethidium bromide-stained agarose gel image for Figure 5f; Lane 4 of Figure 5f showing the amplified Fragment C has been taken from lane 3.
